# Supplementary material for: A Scientific Synthesis of Marine Protected Areas in the United States: Status and Recommendations
Source: Frontiers journal article supplement (doi:10.3389/fmars.2022.849927), 2022-05-18
Supplement: Data_Sheet_1.pdf [file Data_Sheet_1.pdf]

*Supplementary Material*

**Supplementary Figure 1.** Map of 50 largest MPAs included in this analysis.

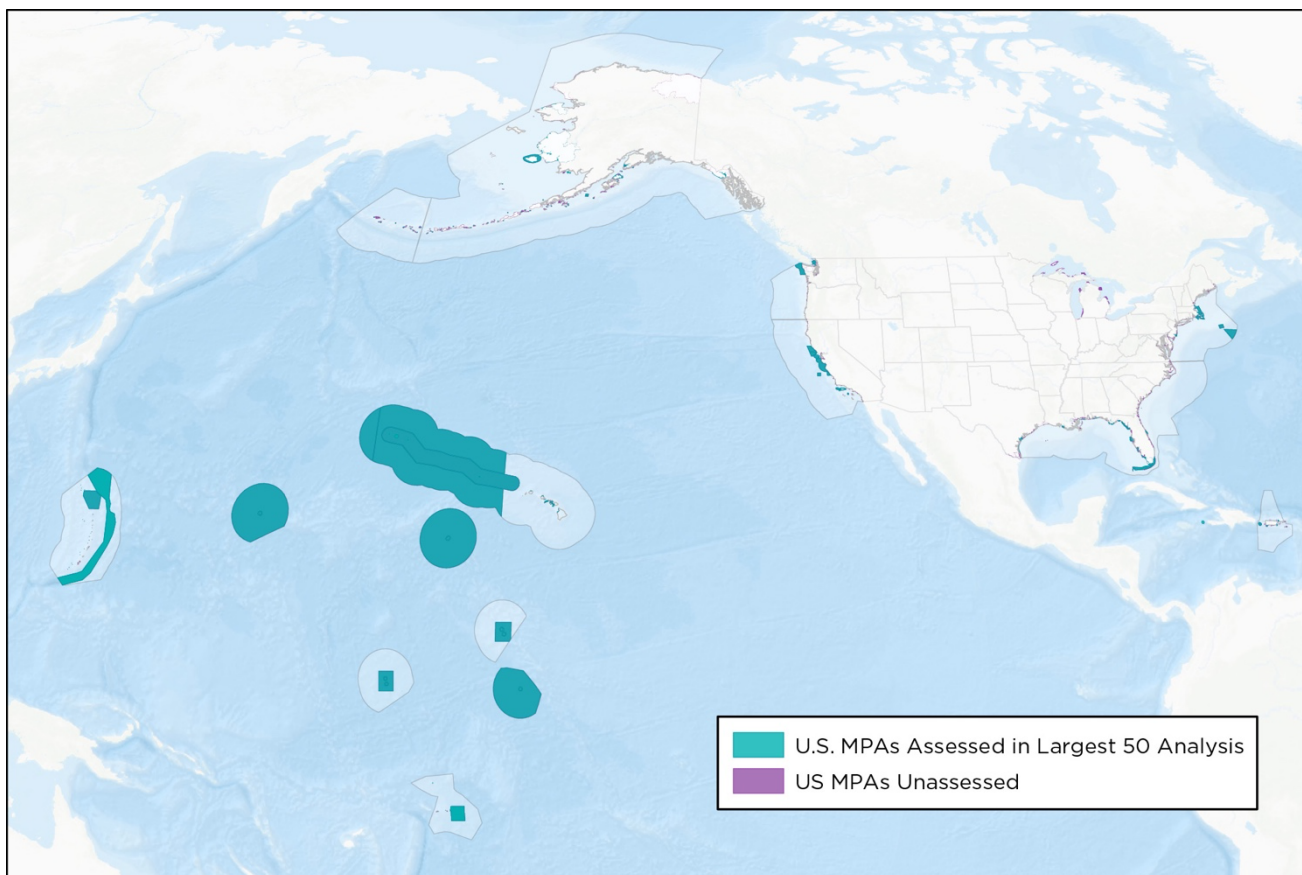

**Supplementary Table 1.** Types of areas in U.S. waters that may be considered MPAs.

| <b>MPA Type</b>                      | <b>Number</b> | <b>Total Area<br/>km<sup>2</sup><br/>(marine)</b> | <b>Authority/Management</b>                                                                                                             |
|--------------------------------------|---------------|---------------------------------------------------|-----------------------------------------------------------------------------------------------------------------------------------------|
| National Marine Monument             | 10            | 3,079,716                                         | Designated by President through Antiquities Act; primarily located in remote Pacific; managed by NOAA and US Fish and Wildlife Service. |
| National Marine Sanctuary            | 15            | 104,572                                           | Designated through National Marine Sanctuaries Act; multiple use MPAs; managed by NOAA.                                                 |
| National Parks                       | 40            | 9,949                                             | Designated through National Parks Organic Act; managed by National Parks Service                                                        |
| National Wildlife Refuges            | 155           | 242,518                                           | Managed by the US Fish and Wildlife Service.                                                                                            |
| National Estuarine Research Reserves | 29            | 2,920                                             | Established and managed through partnerships between NOAA and state agencies.                                                           |
| State MPAs                           | 572           | 28,220                                            | State level authorities.                                                                                                                |
| Territorial MPAs                     | 62            | 2,885                                             | Varies by territory.                                                                                                                    |
| Local MPAs                           | 11            | 10                                                | Varies by local context.                                                                                                                |
| Partnership and Other MPAs           | 85            | 372,964                                           | *Mostly partnership MPAs and other federal MPAs not captured above                                                                      |

**Supplementary Table 2.** Table of U.S. states or territories by marine area (km<sup>2</sup>) in any type of implemented MPA in state waters.

| State                    | Total Marine Area (km <sup>2</sup> ) | Area in Implemented MPAs (km <sup>2</sup> ) | Percent Marine Area in Implemented MPAs |
|--------------------------|--------------------------------------|---------------------------------------------|-----------------------------------------|
| Florida                  | 38,051                               | 16,432                                      | 43.2%                                   |
| Alaska                   | 180,788                              | 16,227                                      | 9.0%                                    |
| California               | 14,540                               | 6,676                                       | 45.9%                                   |
| Massachusetts            | 6,469                                | 5435                                        | 84.0%                                   |
| Hawaii                   | 11,528                               | 4,903                                       | 42.5%                                   |
| Puerto Rico              | 13,498                               | 3,258                                       | 24.1%                                   |
| Washington               | 9,762                                | 2,951                                       | 30.2%                                   |
| Texas                    | 16,258                               | 981                                         | 6.0%                                    |
| Louisiana                | 14,497                               | 628                                         | 4.3%                                    |
| Northern Mariana Islands | 3,141                                | 452                                         | 14.4%                                   |
| Oregon                   | 3,650                                | 408                                         | 11.2%                                   |
| American Samoa           | 1,329                                | 323                                         | 24.3%                                   |
| New Jersey               | 2,993                                | 305                                         | 10.2%                                   |
| Virgin Islands           | 1,535                                | 297                                         | 19.3%                                   |
| North Carolina           | 11,620                               | 295                                         | 2.5%                                    |
| South Carolina           | 2,809                                | 248                                         | 8.8%                                    |
| Mississippi              | 1,998                                | 245                                         | 12.3%                                   |
| Virginia                 | 7,153                                | 140                                         | 2.0%                                    |
| New York                 | 4,733                                | 135                                         | 2.9%                                    |
| Maryland                 | 6,506                                | 121                                         | 1.9%                                    |
| Georgia                  | 1,587                                | 65                                          | 4.1%                                    |
| Guam                     | 915                                  | 47                                          | 5.2%                                    |
| New Hampshire            | 225                                  | 28                                          | 12.7%                                   |
| Alabama                  | 2,003                                | 20                                          | 1.0%                                    |
| Rhode Island             | 1,182                                | 13                                          | 1.1%                                    |
| Maine                    | 7,704                                | 9                                           | 0.1%                                    |
| Delaware                 | 1,321                                | 9                                           | 0.7%                                    |
| Connecticut              | 1,504                                | 1                                           | 0.1%                                    |

**Supplementary Table 3.** The four elements of *The MPA Guide* (Gorud-Colvert et al., 2021). Summary of Outcomes from <http://mpa-guide.protectedplanet.net>.

| Element                | Components                         | Summary Description                                                                                                                                                                                                                                                                                                                                                                                                                                                                                                                                               |
|------------------------|------------------------------------|-------------------------------------------------------------------------------------------------------------------------------------------------------------------------------------------------------------------------------------------------------------------------------------------------------------------------------------------------------------------------------------------------------------------------------------------------------------------------------------------------------------------------------------------------------------------|
| Stage of Establishment | Proposed/Committed                 | The intent to create an MPA is made public. <ul style="list-style-type: none"> <li>- Site of importance identified for conservation</li> <li>- Conservation is the primary objective</li> <li>- Announced in some formal manner</li> <li>- Announcement is non-binding</li> </ul>                                                                                                                                                                                                                                                                                 |
|                        | Designated                         | MPA is established/recognized through legal or traditional means. <ul style="list-style-type: none"> <li>- Defined boundaries</li> <li>- Legal gazettement or equivalent recognition</li> <li>- Established for the long term</li> <li>- Clearly stated goals and process to define allowed uses and control impacts with associated regulations or rules</li> </ul>                                                                                                                                                                                              |
|                        | Implemented                        | MPA is acknowledged to be “in force” on the water with plans for management activated. <ul style="list-style-type: none"> <li>- MPA has plan for regulating activities</li> <li>- Existence of management body/team</li> <li>- Resource user is aware of MPA regulations</li> <li>- Plans for management activated.</li> </ul>                                                                                                                                                                                                                                    |
|                        | Actively Managed                   | Management of the area is ongoing with periodic review and changes made as needed to achieve conservation goals. There is: <ul style="list-style-type: none"> <li>- ongoing monitoring</li> <li>- community engagement</li> <li>- management evaluation</li> </ul>                                                                                                                                                                                                                                                                                                |
| Level of Protection    | Fully Protected                    | No extractive or destructive activities are allowed, and all abatable impacts are minimized.                                                                                                                                                                                                                                                                                                                                                                                                                                                                      |
|                        | Highly Protected                   | Only light extractive activities are allowed with low total impact, and all other abatable impacts minimized.                                                                                                                                                                                                                                                                                                                                                                                                                                                     |
|                        | Lightly Protected                  | Some protection of biodiversity exists but moderate to significant extraction and other impacts are allowed.                                                                                                                                                                                                                                                                                                                                                                                                                                                      |
|                        | Minimally Protected                | Extensive extraction and other impacts are allowed, but site still provides some conservation benefit to the area.                                                                                                                                                                                                                                                                                                                                                                                                                                                |
| Enabling Conditions    | Across all Stages of Establishment | <ul style="list-style-type: none"> <li>- Clearly defined vision and objectives</li> <li>- Long-term political will and commitment</li> <li>- Sustainable financing</li> <li>- Public participation with contextual and procedural fairness</li> <li>- Evidence-based decision-making</li> <li>- Knowledge integration, e.g., across academic disciplines, local, Indigenous, practitioner domains</li> <li>- Coordination with related governance institutions</li> <li>- Collaboration across jurisdictions</li> <li>- Transparency and communication</li> </ul> |

|  |                                       |                                                                                                                                                                                                                                                                                                                                                                                                                                                                                                                                                                                                                                                                                                                                                                                                                                                                                                                                                                                                                                   |
|--|---------------------------------------|-----------------------------------------------------------------------------------------------------------------------------------------------------------------------------------------------------------------------------------------------------------------------------------------------------------------------------------------------------------------------------------------------------------------------------------------------------------------------------------------------------------------------------------------------------------------------------------------------------------------------------------------------------------------------------------------------------------------------------------------------------------------------------------------------------------------------------------------------------------------------------------------------------------------------------------------------------------------------------------------------------------------------------------|
|  |                                       | <ul style="list-style-type: none"> <li>- Upward and downward accountability to legal mandate and to stakeholders</li> <li>- Recognition and support of existing governance by Indigenous peoples and local rights-holders, including sovereignty, self-determination, and rights of access, use, and management</li> <li>- Conflict resolution mechanisms</li> </ul>                                                                                                                                                                                                                                                                                                                                                                                                                                                                                                                                                                                                                                                              |
|  | From Proposed/Committed to Designated | <p>All the Enabling Conditions above, plus Ecological design principles:</p> <ul style="list-style-type: none"> <li>- Viability based on MPA location, size, spacing, shape, and permanence</li> <li>- Representativeness and replication of habitats</li> <li>- Incorporation of habitats and species of unique conservation value</li> <li>- Design for connectivity and resilience</li> <li>- Precautionary approach considering current and emerging threats</li> <li>- Consideration of existing threats and mitigation</li> </ul> <p>Social Design Principles:</p> <ul style="list-style-type: none"> <li>- Inclusion of social objectives for multi-dimensional human well-being</li> <li>- Recognition of pre-existing rights, tenure, uses: extractive and non-extractive</li> <li>- Consideration of pre-existing resource use and socio-economic status</li> <li>- Accounting for unequal costs and benefits to different social groups</li> <li>- Impact- and benefit-sharing with distributional fairness</li> </ul> |
|  | From Designated to Implemented        | <p>All the Enabling Conditions above, plus:</p> <ul style="list-style-type: none"> <li>- Sufficient and properly organized staffing and funding</li> <li>- Appropriate and adequate administrative structures and processes</li> <li>- Stakeholder engagement plan</li> <li>- Compliance and enforcement (including graduated sanctioning)</li> <li>- Education and outreach initiatives</li> <li>- Clarity of rules, rights, and boundaries</li> </ul>                                                                                                                                                                                                                                                                                                                                                                                                                                                                                                                                                                           |
|  | From Implemented to Actively Managed  | <p>All the Enabling Conditions above, plus:</p> <ul style="list-style-type: none"> <li>- Ongoing monitoring, evaluation, and knowledge sharing</li> <li>- Adaptive management</li> <li>- Support for livelihoods, e.g. development programs, capacity building, hiring</li> <li>- Effective management of broader seascape and external pressures</li> <li>- Ongoing efforts to build trust, strong local leadership, partnerships with local users</li> <li>- Local collaboration in monitoring, enforcement, and management</li> </ul>                                                                                                                                                                                                                                                                                                                                                                                                                                                                                          |

|                                                                                                             |                     |                                                                                                                                                                                                                                                                                                                                                                                                                                                                                                                                                                                                                                                                                                                                                                                                                                                                                                                |
|-------------------------------------------------------------------------------------------------------------|---------------------|----------------------------------------------------------------------------------------------------------------------------------------------------------------------------------------------------------------------------------------------------------------------------------------------------------------------------------------------------------------------------------------------------------------------------------------------------------------------------------------------------------------------------------------------------------------------------------------------------------------------------------------------------------------------------------------------------------------------------------------------------------------------------------------------------------------------------------------------------------------------------------------------------------------|
|                                                                                                             |                     | - Ongoing consideration of cultural values, traditions, and activities in site management                                                                                                                                                                                                                                                                                                                                                                                                                                                                                                                                                                                                                                                                                                                                                                                                                      |
| Outcomes expected, assuming all Enabling Conditions are in place and MPA is Implemented or Actively Managed | Fully Protected     | Fully Protected areas have the greatest potential to restore and protect biodiversity and healthy ecosystems, and the benefits they provide to people. Long-term recovery of species, habitats, ecosystem functioning, and resilience is most likely in Fully Protected areas. Population replenishment and high reproductive rates inside a Fully Protected MPA can lead to greater benefits to populations outside through spillover of adults, eggs and larvae. Spillover of targeted species can also benefit nearby fisheries, leading to increased catch, profit, and long-term sustainability of the fishery. Fully Protected MPAs can also help provide mitigation, adaptation, and resilience for climate solutions, including enhancing carbon sequestration and safeguarding carbon storage in sediments, enhancing productivity, mitigating local acidification, and providing coastal protection. |
|                                                                                                             | Highly Protected    | Highly Protected areas also have a high likelihood of restoring and protecting biodiversity and healthy ecosystems, and delivering benefits similar to those described for Fully Protected areas. However, outcomes for any species that are still exploited or adversely impacted by activities in the MPA will likely be lower than with Fully Protected areas. Highly Protected areas may provide cultural and subsistence benefits through support of specific, limited take for traditional or cultural reasons, using specific gears and by certain user groups. Protection can enhance these values through recovery of habitats and species and by providing opportunities for continuation of sustainable cultural practices.                                                                                                                                                                         |
|                                                                                                             | Lightly Protected   | Lightly Protected areas can benefit species that are given specific protections, potentially leading to larger population and body sizes, biomass, reproductive output, and genetic diversity. However, exploited or impacted species may not experience outcomes that are different from unprotected areas. Likewise, overall species diversity is unlikely to increase, except with respect to species given specific protections. Recovery of ecosystem functioning and resilience is likely to be limited and incomplete. Thus, Lightly Protected areas are unlikely to deliver the benefits healthy ecosystems provide to people, including recovery and spillover of exploited species, climate change mitigation, adaptation, and resilience, and water quality improvement.                                                                                                                            |
|                                                                                                             | Minimally Protected | Minimally Protected areas are unlikely to deliver substantial positive outcomes for species, habitats, or human communities. It is likely that impactful activities in these areas will result in continued decline of species and habitats, altered ecosystem functioning, and lowered ecosystem                                                                                                                                                                                                                                                                                                                                                                                                                                                                                                                                                                                                              |

|  |  |                                                                                                                                                                                                                                                                                                                                                        |
|--|--|--------------------------------------------------------------------------------------------------------------------------------------------------------------------------------------------------------------------------------------------------------------------------------------------------------------------------------------------------------|
|  |  | resilience. Minimally Protected areas are also unlikely to deliver other benefits that may be expected from MPAs with greater levels of protection, such as for water quality, climate resilience, and exploited species. In some cases the biodiversity conservation benefits may be negligible and thus difficult to discern from unprotected areas. |
|--|--|--------------------------------------------------------------------------------------------------------------------------------------------------------------------------------------------------------------------------------------------------------------------------------------------------------------------------------------------------------|



**Supplementary Table 4.** The 50 largest U.S. MPAs and zones there-in by level of protection and stage of establishment. MPA areas were obtained from the Marine Conservation Institute’s Marine Protection Atlas (MPAtlas.org) database and NOAA’s Marine Protected Areas Inventory (NOAA, 2020). Certain large MPAs also overlapped with other large MPAs of different jurisdiction; when this occurred we evaluated the level of protection of each management area individually, based on the activities happening in that specific area. This is reflected in the “Rank Size” column, where sites that overlap share the same rank. Areas within the same rank add up to the total size of the largest area. Some of these large MPAs also include smaller MPAs within their boundaries which may afford different levels of protection. We did not assess these here, as the total area coverage of these small MPAs was negligible relative to the large MPA in almost all cases. However, more than 20% of the Channel Islands National Marine Sanctuary is covered by a network of other smaller MPAs, many of which are fully and highly protected (see table S7). Stage of establishment and level of protection were assessed according to The MPA Guide (Gronrud-Colvert et al., 2021). The MPA Guide level of protection is assigned using a decision tree that classifies each MPA zone based on impact of the activities (out of the seven that might be occurring in an MPA as the Guide assesses: mining, dredging/dumping, anchoring, infrastructure, fishing, aquaculture, and non-extractive activities) that are occurring within the area and impacting biodiversity, regardless of managing authority (see [mpa-guide.protectedplanet.net](http://mpa-guide.protectedplanet.net) for resources and an interactive decision tree). This information is summarized in the “Most Impactful Activity” and “Details on Level of Protection” columns below. To evaluate, we used the management plans, scientific literature, information from personal communications with managers, and overlaying regulations from overlapping jurisdictions to record information on management, regulations, allowed and active uses and their impacts, including fishing gear types in use, and current threats to biodiversity. These were identified via extensive online searches using management- and activity-based keywords. The level and stage of an MPA are best assessed by local experts, such as managers, with first-hand experience of the impacts to biodiversity in an area. We contacted individual MPA experts (e.g., the MPA manager or staff) to request information if needed, for example on active management and activity impacts. New information, regulations, or changes in human activities may affect these levels and stages. For areas marked “unknown”, we did not find sufficient detail on impacts and/or establishment to evaluate a level of protection and/or stage of establishment.

| Rank<br>Size | Name                   | Designation              | Zones                                                                                                                                                  | Marine<br>Area (km <sup>2</sup> ) | Stage of<br>Establishment | Level of<br>Protection | Most<br>Impactful<br>Activity | Details on Level of Protection                                      |
|--------------|------------------------|--------------------------|--------------------------------------------------------------------------------------------------------------------------------------------------------|-----------------------------------|---------------------------|------------------------|-------------------------------|---------------------------------------------------------------------|
| 1            |                        |                          | Papahānaumokuākea, excluding Midway Atoll National Wildlife Refuge, Hawaiian Islands National Wildlife Refuge, and Kure Atoll State Wildlife Sanctuary | 358,447.0                         | Actively Managed          | Highly                 | fishing                       | Limited, low-impact fishing by permit                               |
|              | Papahānaumokuākea      | Marine National Monument | Papahānaumokuākea a 2016 Expansion                                                                                                                     | 1,146,564.8                       | Actively Managed          | Highly                 | fishing                       | Limited, low-impact fishing by permit                               |
|              | Midway Atoll           | National Wildlife Refuge |                                                                                                                                                        | 2,349.7                           | Actively Managed          | Highly                 | fishing                       | Limited, low-impact fishing by permit                               |
|              | Hawaiian Islands       | National Wildlife Refuge |                                                                                                                                                        | 1,031.4                           | Actively Managed          | Fully                  | N/A                           | Minimal/no impactful extractive or destructive activities occurring |
|              | Kure Atoll             | State Wildlife Sanctuary |                                                                                                                                                        | 332.0                             | Actively Managed          | Fully                  | N/A                           | Minimal/no impactful extractive or destructive activities occurring |
| 2            | Pacific Remote Islands | Marine National Monument | Pacific Remote Islands, excluding Baker, Howland Island, Jarvis Island, Kingman Reef, Palmyra Atoll, and Wake Atoll National Wildlife Refuges          | 1,245,266.9                       | Implemented               | Highly                 | fishing                       | Limited, low-impact fishing by permit                               |
|              | Baker Island           | National Wildlife Refuge |                                                                                                                                                        | 1,650.1                           | Implemented               | Fully                  | N/A                           | Minimal/no impactful extractive or destructive activities occurring |
|              | Howland Island         | National Wildlife Refuge |                                                                                                                                                        | 1,674.8                           | Implemented               | Fully                  | N/A                           | Minimal/no impactful extractive or destructive activities occurring |

|   |                               |                                                   |                                                                                                                                                                              |           |                  |                  |         |                                                                                                                      |
|---|-------------------------------|---------------------------------------------------|------------------------------------------------------------------------------------------------------------------------------------------------------------------------------|-----------|------------------|------------------|---------|----------------------------------------------------------------------------------------------------------------------|
|   | Jarvis Island                 | National Wildlife Refuge                          |                                                                                                                                                                              | 1,740.5   | Implemented      | Fully            | N/A     | Minimal/no impactful extractive or destructive activities occurring                                                  |
|   | Johnston Atoll                | National Wildlife Refuge                          |                                                                                                                                                                              | 2,187.1   | Implemented      | Fully            | N/A     | Minimal/no impactful extractive or destructive activities occurring                                                  |
|   | Kingman Reef                  | National Wildlife Refuge                          |                                                                                                                                                                              | 1,955.2   | Implemented      | Fully            | N/A     | Minimal/no impactful extractive or destructive activities occurring                                                  |
|   | Palmyra Atoll                 | National Wildlife Refuge                          |                                                                                                                                                                              | 2,029.9   | Implemented      | Highly           | fishing | Limited, low-impact fishing by permit                                                                                |
|   | Wake Atoll                    | National Wildlife Refuge                          |                                                                                                                                                                              | 2,008.1   | Implemented      | Highly           | fishing | Limited, low-impact fishing by permit                                                                                |
| 3 | Mariana Trench                | National Wildlife Refuge/Marine National Monument | Trench Unit – including Mariana Trench National Wildlife Refuge                                                                                                              | 204,500.0 | Implemented      | Seafloor: Fully  | N/A     | Benthic protections only.                                                                                            |
|   | Mariana Trench                | National Wildlife Refuge/Marine National Monument | Volcanic Unit – including Mariana Arc of Fire National Wildlife Refuge                                                                                                       | 221.3     | Implemented      | Seafloor: Highly | fishing | Benthic protections only. Only infrequent use of 5 or fewer selective and low-impact gear types (e.g., single line). |
|   | Marianas Trench               | Marine National Monument                          | Islands Unit                                                                                                                                                                 | 42,467.7  | Implemented      | Highly           | fishing | Limited, low-impact fishing by permit                                                                                |
| 4 | Rose Atoll/<br>American Samoa | Marine National Monument                          | Rose Atoll Marine National Monument/Muliāva Unit of American Samoa National Marine Sanctuary (excluding Vaiulu'u Seamount), excluding the Rose Atoll no-take zone/Rose Atoll | 34,643.0  | Actively Managed | Highly           | fishing | Limited, low-impact fishing by permit                                                                                |

|   |                                 |                           |                                                                                                                                                                    |          |                  |           |         |                                                                                                                                                                                                 |
|---|---------------------------------|---------------------------|--------------------------------------------------------------------------------------------------------------------------------------------------------------------|----------|------------------|-----------|---------|-------------------------------------------------------------------------------------------------------------------------------------------------------------------------------------------------|
|   | American Samoa                  | National Marine Sanctuary | National Wildlife Refuge                                                                                                                                           |          |                  |           |         |                                                                                                                                                                                                 |
|   |                                 |                           | Rose Atoll [12nm no-take zone], Rose Atoll National Wildlife Refuge                                                                                                | 157.6    | Actively Managed | Fully     | N/A     | Minimal/no impactful extractive or destructive activities occurring                                                                                                                             |
|   |                                 |                           | Muliāva Unit - Vaiulu'u Seamount                                                                                                                                   | 130.8    | Actively Managed | Unknown   | N/A     |                                                                                                                                                                                                 |
|   |                                 |                           | Swains Island Unit                                                                                                                                                 | 135.4    | Actively Managed | Unknown   | N/A     |                                                                                                                                                                                                 |
|   |                                 |                           | Ta'u Unit                                                                                                                                                          | 37.8     | Actively Managed | Unknown   | N/A     |                                                                                                                                                                                                 |
|   |                                 |                           | Aunu'u Unit                                                                                                                                                        | 15.1     | Actively Managed | Unknown   | N/A     |                                                                                                                                                                                                 |
|   |                                 |                           | Fagalua/Fogama'a Unit                                                                                                                                              | 1.2      | Actively Managed | Unknown   | N/A     |                                                                                                                                                                                                 |
|   |                                 |                           | Fagatele Bay Unit                                                                                                                                                  | 0.7      | Actively Managed | Fully     | N/A     | Minimal/no impactful extractive or destructive activities occurring                                                                                                                             |
| 5 | Monterey Bay                    | National Marine Sanctuary |                                                                                                                                                                    | 15,780.7 | Actively Managed | Minimally | fishing | Large-impact fishing gear types in use (e.g., trawls, purse seines, gillnets)                                                                                                                   |
| 6 | Northeast Canyons and Seamounts | Marine National Monument  |                                                                                                                                                                    | 12,713.4 | Implemented      | Highly    | fishing | Only infrequent use of 5 or fewer selective and low-impact gear types (red crab and lobster commercial fishing, which will be phased out by 2023; recreational fishing using e.g., single line) |
| 7 | Yukon Delta                     | National Wildlife Refuge  |                                                                                                                                                                    | 12,527.7 | Implemented      | Lightly   | fishing | Moderate-impact gear types in use (e.g., gillnet for salmon)                                                                                                                                    |
| 8 | Florida Keys                    | National Marine Sanctuary | Florida Keys National Marine Sanctuary, excluding SPAs, Special Use Research Only Areas, Key West NWR, Great White Heron NWR, John Pennkamp Coral Reef State Park, | 6,719.9  | Actively Managed | Minimally | fishing | Large number (>10) of gear types in use (e.g., longlines, beach seines, longlines, spearfishing by SCUBA and freediving, traps, nets, lines, gleaning)                                          |

|                           |                          |                                                                                                          |       |                  |         |                                                      |                                                                                                                                                                                                                                             |
|---------------------------|--------------------------|----------------------------------------------------------------------------------------------------------|-------|------------------|---------|------------------------------------------------------|---------------------------------------------------------------------------------------------------------------------------------------------------------------------------------------------------------------------------------------------|
|                           |                          | National Key Deer Refuge, and Dry Tortugas Ecological Reserves, National Park, and Research Natural Area |       |                  |         |                                                      |                                                                                                                                                                                                                                             |
|                           |                          | Sanctuary Preservation Areas (SPAs)                                                                      | 16.5  | Actively Managed | Highly  | fishing                                              | Only infrequent use of 5 or fewer selective and low-impact gear types (bait fishing using cast nets by permit, trolling in some areas)                                                                                                      |
|                           |                          | Special Use Research Only Areas                                                                          | 2.1   | Actively Managed | Fully   | N/A                                                  | Minimal/no impactful extractive or destructive activities occurring                                                                                                                                                                         |
| Key West                  | National Wildlife Refuge |                                                                                                          | 842.8 | Actively Managed | Lightly | fishing                                              | Moderate number of moderate-impact gear types (e.g., beach seines, spearfishing by SCUBA)                                                                                                                                                   |
| Great White Heron         | National Wildlife Refuge |                                                                                                          | 801.5 | Actively Managed | Lightly | fishing                                              | Moderate number of moderate-impact gear types (e.g., beach seines, spearfishing by SCUBA)                                                                                                                                                   |
| National Key Deer Refuge  | National Wildlife Refuge |                                                                                                          | 463.0 | Actively Managed | Lightly | dredging/dumping, infrastructure                     | Moderate-impact activities occurring (e.g., maintenance dredging, ports and harbors)                                                                                                                                                        |
| Dry Tortugas - North      | Ecological Reserves      |                                                                                                          | 282.5 | Actively Managed | Fully   | N/A                                                  | Minimal/no impactful extractive and destructive activities occurring                                                                                                                                                                        |
| John Pennekamp Coral Reef | State Park               |                                                                                                          | 239.3 | Actively Managed | Lightly | anchoring, dredging/dumping, fishing, non-extractive | Moderate-impact activities occurring (e.g., fishing using moderate number of moderate-impact gear types; anchoring in sensitive seagrass habitats; dredging can occur by permit and dumping from live-aboard vessels has discharged sewage) |
| Dry Tortugas - South      | Ecological Reserves      |                                                                                                          | 187.2 | Actively Managed | Fully   | N/A                                                  | Minimal/no impactful extractive and destructive activities occurring                                                                                                                                                                        |
| Dry Tortugas              | National Park            |                                                                                                          | 145.4 | Actively Managed | Lightly | anchoring, fishing, non-extractive                   | Cumulative impact of activities is moderate (e.g., anchoring in sensitive habitats (coral, seagrass); fishing using moderate number of gear types with moderate impact)                                                                     |
| Dry Tortugas              | Research Natural Area    |                                                                                                          | 119.4 | Actively Managed | Fully   | N/A                                                  | Minimal/no impactful extractive and destructive activities occurring                                                                                                                                                                        |

|    |                                          |                           |                                                                                   |         |                  |           |                                                 |                                                                                                                                                                                                                                                                                   |
|----|------------------------------------------|---------------------------|-----------------------------------------------------------------------------------|---------|------------------|-----------|-------------------------------------------------|-----------------------------------------------------------------------------------------------------------------------------------------------------------------------------------------------------------------------------------------------------------------------------------|
| 9  | Greater Farallones                       | National Marine Sanctuary |                                                                                   | 8,539.2 | Actively Managed | Minimally | fishing                                         | Large number (>10) of gear types in use, including large-impact (e.g., long lines, gillnets, seines, traps, bottom and mid-water trawls, single line)                                                                                                                             |
| 10 | Olympic Coast                            | National Marine Sanctuary |                                                                                   | 8,255.4 | Actively Managed | Minimally | fishing                                         | Large-impact fishing gear types in use (e.g., purse seines, trawls)                                                                                                                                                                                                               |
| 11 | Channel Islands                          | National Marine Sanctuary | Channel Islands National Marine Sanctuary excluding Channel Islands National Park | 3,797.8 | Actively Managed | Lightly   | fishing, anchoring, non-extractive              | Moderate number of moderate-impact gear types in use (e.g., nets, traps, lines, spearfishing by SCUBA); some unregulated anchoring with moderate impact e.g., in sensitive habitats                                                                                               |
|    | Channel Islands                          | National Park             |                                                                                   | 482.8   | Actively Managed | Lightly   | fishing, anchoring, non-extractive              | Moderate number of moderate-impact gear types in use (e.g., nets, traps, lines, spearfishing by SCUBA); some unregulated anchoring with moderate impact e.g., in sensitive habitats                                                                                               |
| 12 | Hawaiian Islands Humpback Whale          | National Marine Sanctuary |                                                                                   | 3,528.8 | Actively Managed | Minimally | fishing, anchoring                              | Large number (>10) of gear types in use (e.g., cast nets, lines, spearfishing (free diving and SCUBA), beach seines, gillnets, surrounding nets near shore, fish traps, lines, spearfishing, traps, longlines); some unregulated anchoring with high impact in sensitive habitats |
| 13 | Steller Sea Lion                         | Rookery Buffer Area       |                                                                                   | 3,356.4 | Implemented      | Fully     | N/A                                             | Minimal/no impactful extractive and destructive activities occurring                                                                                                                                                                                                              |
| 14 | Cordell Bank                             | National Marine Sanctuary |                                                                                   | 3,330.4 | Actively Managed | Minimally | fishing                                         | Large number (>10) of gear types in use, including high-impact gear types (e.g., trawl, gillnets, longlines)                                                                                                                                                                      |
| 15 | Alaska Maritime National Wildlife Refuge | National Wildlife Refuge  | Afognak Buffer Zone                                                               | 1,567.4 | Actively Managed | Lightly   | anchoring, aquaculture, fishing, non-extractive | Some unregulated anchoring including on sensitive habitats; moderate-impact aquaculture at Kitoi Bay Hatchery; moderate-impact gear types in use (e.g., gillnets, type of purse seines, trawls)                                                                                   |
|    |                                          |                           | Semidi Buffer Zone                                                                | 1,008.0 | Actively Managed | Lightly   | fishing                                         | Moderate-impact gear types in use (e.g., type of purse seines, gillnets)                                                                                                                                                                                                          |
|    |                                          |                           | Simeonof 1 Mile Buffer Zone                                                       | 59.1    | Actively Managed | Highly    | fishing                                         | Only infrequent use of 5 or fewer selective and low-impact gear types (bait fishing using cast nets, trolling in some areas)                                                                                                                                                      |

|    |                                        |                            |                                                        |         |                  |           |                                             |                                                                                                                                                            |
|----|----------------------------------------|----------------------------|--------------------------------------------------------|---------|------------------|-----------|---------------------------------------------|------------------------------------------------------------------------------------------------------------------------------------------------------------|
|    |                                        |                            | Karluk Fishing Reservation Zone                        | 27.6    | Actively Managed | Lightly   | fishing                                     | Moderate-impact gear types in use (e.g., purse seines, gillnets)                                                                                           |
|    |                                        |                            | Outer Womens Bay Zone                                  | 17.8    | Actively Managed | Lightly   | fishing                                     | Moderate-impact gear types in use (e.g., purse seines, gillnets)                                                                                           |
| 16 | Cape and Islands                       | Ocean Sanctuary            |                                                        | 2,774.7 | Actively Managed | Minimally | fishing, dredging/dumping, infrastructure   | Large-impact activities occurring (e.g., dredging, discharge from municipal wastewater treatment plants and vessels; fishing using high-impact gear types) |
| 17 | Big Bend Seagrasses                    | Aquatic Preserve           |                                                        | 2,719.8 | Actively Managed | Minimally | fishing                                     | Large number (>10) of gear types in use, including high-impact gear types (e.g., trawls)                                                                   |
| 18 | Glacier Bay National Park and Preserve | National Park and Preserve | External Waters Zone                                   | 980.1   | Actively Managed | Minimally | fishing                                     | Large-impact fishing gears in use (e.g., dredges, longlines, purse seining)                                                                                |
|    |                                        |                            | Proper Commercial Fishing Zone                         | 882.4   | Actively Managed | Lightly   | fishing, anchoring                          | Moderate-impact fishing gear types in use (e.g., longlines, gillnets)                                                                                      |
|    |                                        |                            | Proper Non-Wilderness Zone                             | 214.6   | Actively Managed | Lightly   | fishing                                     | Moderate-impact fishing gear types in use (e.g., longlines, gillnets)                                                                                      |
|    |                                        |                            | Proper Wilderness Zone                                 | 173.9   | Actively Managed | Lightly   | fishing                                     | Moderate-impact fishing gear types in use (e.g., longlines, gillnets)                                                                                      |
| 19 | Everglades                             | National Park              |                                                        | 2,183.9 | Actively Managed | Lightly   | anchoring, dredging/dumping, non-extractive | Moderate-impact activities occurring (e.g., maintenance dredging, anchoring and recreational boating damage to sensitive habitats like seagrass beds)      |
| 20 | Gerry E. Studds/Stellwagen Bank        | National Marine Sanctuary  |                                                        | 2,190.8 | Actively Managed | Minimally | fishing                                     | Large impact fishing gear types in use (e.g., dredges, longlines, purse seines, trawls)                                                                    |
| 21 | Isla de Mona Nature Reserve            | Nature Reserve             | Isla de Mona Natural Reserve - General Protection Zone | 1,418.5 | Actively Managed | Highly    | fishing                                     | Only infrequent use of 5 or fewer selective and low-impact gear types (single line)                                                                        |
|    |                                        |                            | Isla de Mona Natural Reserve (No-Take Zone)            | 86.6    | Actively Managed | Fully     | N/A                                         | Minimal/no impactful extractive and destructive activities occurring                                                                                       |
| 22 | Cape Cod Bay                           | Ocean Sanctuary            |                                                        | 1,508.5 | Actively Managed | Minimally | fishing, dredging/dumping, infrastructure   | Large-impact activities occurring (e.g., dredging, discharge from municipal wastewater treatment plants and vessels; fishing using high-impact gear types) |
| 23 | Navassa Island                         | National Wildlife Refuge   |                                                        | 1,468.0 | Actively Managed | Fully     | N/A                                         | Minimal/no impactful extractive and destructive activities occurring                                                                                       |

|    |                                     |                                            |                               |         |                  |           |                                                      |                                                                                                                                                                                                                                                            |
|----|-------------------------------------|--------------------------------------------|-------------------------------|---------|------------------|-----------|------------------------------------------------------|------------------------------------------------------------------------------------------------------------------------------------------------------------------------------------------------------------------------------------------------------------|
| 24 | Pinellas County Aquatic Preserve    | Aquatic Preserve                           |                               | 1,398.5 | Actively Managed | Minimally | fishing, infrastructure                              | Large-impact activities occurring (e.g., docks, piers, boat ramps, dredging channels; fishing using a large number (>10) of gear types with large impact)                                                                                                  |
| 25 | San Juan County/Cypress Island      | Marine Biological Preserve                 |                               | 1,177.3 | Actively Managed | Minimally | aquaculture                                          | High-impact aquaculture activities                                                                                                                                                                                                                         |
| 26 | Kachemak Bay                        | National Estuarine Research Reserve        |                               | 905.5   | Actively Managed | Minimally | fishing                                              | Large-impact fishing gears in use (e.g., dredges, longlines, gillnets, purse seines, trawling)                                                                                                                                                             |
| 27 | Walrus Islands State Game Sanctuary | State Game Sanctuary                       | Walrus Islands                | 446.6   | Actively Managed | Unknown   | N/A                                                  |                                                                                                                                                                                                                                                            |
|    |                                     |                                            | Walrus Islands - Round Island | 140.3   | Actively Managed | Fully     | N/A                                                  | Minimal/no impactful extractive and destructive activities occurring                                                                                                                                                                                       |
| 28 | Biscayne                            | National Park                              |                               | 672.7   | Actively Managed | Minimally | fishing                                              | Large number (>10) of gear types in use, including high-impact gear types (e.g., trawling)                                                                                                                                                                 |
| 29 | Atchafalaya Delta                   | Wildlife Management Area and Game Preserve |                               | 536.3   | Implemented      | Minimally | fishing, mining                                      | Large-impact activities occurring (e.g., large number (>10) of gear types in use, including high-impact gear types (e.g., trawling, purse seining); oil and gas injection wells, as well as multiple mineral leases, are within the boundaries of the WMA) |
| 30 | Cape Cod                            | Ocean Sanctuary                            |                               | 490.1   | Actively Managed | Minimally | fishing, dredging/dumping, infrastructure            | Large-impact activities occurring (e.g., dredging, discharge from municipal wastewater treatment plants and vessels; fishing using high-impact gear types)                                                                                                 |
| 31 | Mission-Aransas                     | National Estuarine Research Reserve        |                               | 459.3   | Actively Managed | Minimally | fishing, dredging/dumping, mining                    | Large-impact activities occurring (e.g., oil and gas exploration and production are allowed; dredging for shipping; high-impact fishing gears in use, e.g., dredging, trawling)                                                                            |
| 32 | Apalachicola                        | National Estuarine Research Reserve        |                               | 443.0   | Actively Managed | Lightly   | fishing, dredging/dumping, anchoring, non-extractive | Large-impact activities occurring (e.g., some unregulated anchoring in sensitive habitats (seagrass beds); dredging for navigational purposes)                                                                                                             |



|    |                                     |                                     |  |       |                  |           |                                           |                                                                                                                                                                                                      |
|----|-------------------------------------|-------------------------------------|--|-------|------------------|-----------|-------------------------------------------|------------------------------------------------------------------------------------------------------------------------------------------------------------------------------------------------------|
| 33 | Gulf Islands                        | National Seashore                   |  | 443.4 | Actively Managed | Lightly   | dredging/dumping, anchoring, fishing      | Moderate-impact activities occurring (e.g., some unregulated anchoring in sensitive habitats like seagrass beds; fishing using moderate-impact gear types, e.g. beach seines, spearfishing by SCUBA) |
| 34 | North Shore                         | Ocean Sanctuary                     |  | 425.9 | Actively Managed | Minimally | fishing, dredging/dumping, infrastructure | Large-impact activities occurring (e.g., dredging, discharge from municipal wastewater treatment plants and vessels, fishing using high-impact gear types)                                           |
| 35 | Bering Land Bridge                  | National Park and Preserve          |  | 377.2 | Implemented      | unknown   | unknown                                   |                                                                                                                                                                                                      |
| 36 | Gasparilla Sound - Charlotte Harbor | Aquatic Preserve                    |  | 329.6 | Actively Managed | Minimally | fishing, anchoring                        | Large-impact activities occurring (e.g., high-impact anchoring in sensitive habitats; large number (>10) of gear types in use)                                                                       |
| 37 | La Parguera                         | Nature Reserve                      |  | 324.6 | Unknown          | Unknown   |                                           |                                                                                                                                                                                                      |
| 38 | Cabezas de San Juan                 | Reserva Natural                     |  | 305.9 | Implemented      | Highly    | fishing                                   | Only infrequent use of 5 or fewer selective and low-impact gear types (single line)                                                                                                                  |
| 39 | Apalachicola Bay                    | Aquatic Preserve                    |  | 305.0 | Actively Managed | Minimally | infrastructure, fishing                   | Large-impact activities occurring (e.g., high-impact marinas; large number (>10) of gear types in use)                                                                                               |
| 40 | Padre Island                        | National Seashore                   |  | 311.9 | Actively Managed | Minimally | mining                                    | Large-impact activities occurring (mining prospecting and exploitation (gas wells (active and capped), pipelines))                                                                                   |
| 41 | Jacques Cousteau                    | National Estuarine Research Reserve |  | 268.0 | Actively Managed | Minimally | fishing                                   | High-impact fishing gear types in use (e.g., dredging)                                                                                                                                               |
| 42 | St. Joseph Bay                      | Aquatic Preserve                    |  | 263.4 | Actively Managed | Minimally | fishing                                   | Large number (>10) of gear types in use                                                                                                                                                              |
| 43 | Punta Yegüas                        | Reserva Natural                     |  | 262.4 | Unknown          | Unknown   |                                           |                                                                                                                                                                                                      |
| 44 | Biscayne Bay                        | Aquatic Preserve                    |  | 266.9 | Actively Managed | Minimally | fishing, infrastructure                   | Large-impact activities occurring (e.g., high-impact marinas; large number (>10) of gear types in use, including some that are high-impact, that have a cumulative large impact (e.g., crab and      |

|    |                         |                                     |        |       |                  |           |                                                        |                                                                                                                                                            |
|----|-------------------------|-------------------------------------|--------|-------|------------------|-----------|--------------------------------------------------------|------------------------------------------------------------------------------------------------------------------------------------------------------------|
|    |                         |                                     |        |       |                  |           |                                                        | lobster pots, seines, trawling, seines, nets)                                                                                                              |
| 45 | South Essex             | Ocean Sanctuary                     |        | 223.0 | Actively Managed | Minimally | fishing, dredging/dumping, infrastructure              | Large-impact activities occurring (e.g., dredging, discharge from municipal wastewater treatment plants and vessels, fishing using high-impact gear types) |
| 46 | Pine Island Sound       | Aquatic Preserve                    |        | 216.9 | Actively Managed | Minimally | fishing, anchoring, infrastructure                     | Large-impact activities occurring (e.g., high-impact anchoring in sensitive habitats; large number (>10) of gear types in use)                             |
| 47 | Kahoolawe               | Island Reserve                      | Zone A | 201.6 | Actively Managed | Highly    | fishing                                                | Only infrequent use of 5 or fewer selective and low-impact gear types (single line, spearfishing)                                                          |
|    |                         |                                     | Zone B |       | Actively Managed | Highly    | fishing                                                | Only infrequent use of 5 or fewer selective and low-impact gear types (single line, spearfishing, trolling)                                                |
| 48 | Merritt Island          | National Wildlife Refuge            |        | 182.5 | Actively Managed | Minimally | infrastructure                                         | Large-impact activities occurring (e.g., construction of causeway bridges, maintenance of waterways)                                                       |
| 49 | Rookery Bay             | National Estuarine Research Reserve |        | 222.9 | Actively Managed | Lightly   | anchoring, dredging/dumping, non-extractive activities | Moderate-impact activities occurring (e.g., some anchoring in sensitive habitats like seagrass beds and overnight; dredging for navigational purposes)     |
| 50 | Smith and Minor Islands | Aquatic Reserve                     |        | 147.7 | Actively Managed | Minimally | fishing                                                | Large number (>10) of gear types in use, including high-impact gear types (e.g., purse seines, beach seines, gillnets, crab traps, geoduck harvest)        |

**Supplementary Table 5.** Area and percent of MPAs in each U.S. Commission for Environmental Cooperation (CEC) Marine Ecoregion (Wilkinson et al., 2009) that fall within this Largest 50 analysis.

| <b>CEC Marine Ecoregion</b>     | <b>Non-MPA Area (km<sup>2</sup>)</b> | <b>MPA Area (km<sup>2</sup>) in Largest 50 analysis</b> | <b>Percent of Total MPA Area included in Largest 50 analysis</b> |
|---------------------------------|--------------------------------------|---------------------------------------------------------|------------------------------------------------------------------|
| Acadian Atlantic                | 95,108                               | 4,684                                                   | 98.9%                                                            |
| Alaskan/Fjordland Pacific       | 1,694,900                            | 6,295                                                   | 95.9%                                                            |
| Aleutian Archipelago            | 180,854                              | 2,057                                                   | 93.2%                                                            |
| Arctic Basin                    | 228,997                              | 0                                                       | N/A                                                              |
| Beaufort/Chukchi Seas           | 278,357                              | 289                                                     | 44.0%                                                            |
| Bering Sea                      | 1,284,701                            | 12,683                                                  | 100%                                                             |
| Caribbean Sea                   | 207,257                              | 3,925                                                   | 77.8%                                                            |
| Carolinian Atlantic             | 123,689                              | 169                                                     | 16.2%                                                            |
| Columbian Pacific               | 433,766                              | 9,501                                                   | 91.7%                                                            |
| Gulf Stream                     | 307,473                              | 0                                                       | N/A                                                              |
| Hawaiian Archipelago            | 961,401                              | 1,511,299                                               | 100%                                                             |
| Montereyan Pacific Transition   | 245,669                              | 27,602                                                  | 98.5%                                                            |
| Northern Gulf of Mexico         | 491,765                              | 6,817                                                   | 86.6%                                                            |
| Northern Gulf Stream Transition | 194,857                              | 12,599                                                  | 100%                                                             |
| South Florida/Bahamian Atlantic | 68,557                               | 13,103                                                  | 92.1%                                                            |
| Southern Californian Pacific    | 98,622                               | 3,769                                                   | 88.7%                                                            |
| Southern Gulf of Mexico         | 142,423                              | 0                                                       | N/A                                                              |
| Virginian Atlantic              | 242,796                              | 6,293                                                   | 92.8%                                                            |
| Not in CEC Marine Ecoregion     | 1,802,012                            | 1,556,756                                               | 99.9%                                                            |
| <b>Grand Total</b>              | <b>9,082,766</b>                     | <b>3,177,840</b>                                        | <b>99.7%</b>                                                     |

**Supplementary Table 6.** Area (km<sup>2</sup>) in Protected Areas in the U.S. waters of the Laurentian Great Lakes. Also includes other areas (fish refuges, de facto protected areas, and cultural protected areas) that may qualify as OECMs. Adapted from Parker et al. (2017) and updated to include the Wisconsin Shipwreck Coast NMS.

| Designation                  | Lake Superior | Lake Huron | Lake Michigan | Lake Erie | Lake Ontario | Great Lakes (US) |       |
|------------------------------|---------------|------------|---------------|-----------|--------------|------------------|-------|
|                              |               |            |               |           |              | Total            | %     |
| Total US Lake Area           | 54,248        | 24,286     | 60,769        | 13,790    | 9,407        | 162,500          |       |
| Total Protected Area         | 11            | 11,060     | 0             | 2         | 0            | 13,565           | 8.2%  |
| Other: Fish Refuge           | 1,099         | 2,089      | 5,508         | 1         |              | 8,697            | 5.4%  |
| Other: De Facto              | 1,085         | 1,179      | 3,273         | 206       | 3            | 5,746            | 3.5%  |
| Other: Cultural              | 2,292         | 1,160      | 1,701         |           |              | 5,153            | 3.2%  |
| Total Protected Area + Other | 4,487         | 15,488     | 10,482        | 209       | 3            | 33,161           | 20.0% |
| % Protected                  | <0.01%        | 45.5%      | 0             | <0.01%    | 0            | 8.2%             |       |
| % Protected + Other          | 8.3%          | 63.8%      | 17.2%         | 1.5%      | 0.0%         | 20.0%            |       |

**Supplementary Table 7.** Level of protection and stage of establishment for the 21.9% of the Channel Islands National Marine Sanctuary that is covered by a network of other smaller MPAs. Stage of establishment and level of protection were assessed according to The MPA Guide (Gorud-Colvert et al., 2021). The MPA Guide level of protection is assigned using a decision tree that classifies each MPA zone based on impact of the activities (out of the seven that might be occurring in an MPA as the Guide assesses: mining, dredging/dumping, anchoring, infrastructure, fishing, aquaculture, and non-extractive activities) that are occurring within the area and impacting biodiversity, regardless of managing authority (see [mpa-guide.protectedplanet.net](http://mpa-guide.protectedplanet.net) for resources and an interactive decision tree). This information is summarized in the “Most Impactful Activity” and “Details on Level of Protection” columns below. To evaluate, we used the management plans, scientific literature, information from personal communications, and overlaying regulations from overlapping jurisdictions to record information on management, regulations, allowed and active uses and their impacts, including fishing gear types in use, and current threats to biodiversity. These were identified via extensive online searches using management- and activity-based keywords. The level and stage of an MPA are best assessed by local experts, such as managers, with first-hand experience of the impacts to biodiversity in an area. New information, regulations, or changes in human activities may affect these levels and stages.

| Name                                 | Designation            | Marine Area (km <sup>2</sup> ) | Stage of Establishment | Level of Protection | Most Impactful Activity | Details on Level of Protection                                      |
|--------------------------------------|------------------------|--------------------------------|------------------------|---------------------|-------------------------|---------------------------------------------------------------------|
| Santa Barbara Island                 | Federal Marine Reserve | 113.9                          | Actively Managed       | Fully               | N/A                     | Minimal/no impactful extractive or destructive activities occurring |
| Richardson Rock (San Miguel Island)  | State Marine Reserve   | 105.5                          | Actively Managed       | Fully               | N/A                     | Minimal/no impactful extractive or destructive activities occurring |
| Richardson Rock (San Miguel Island)  | Federal Marine Reserve | 82.8                           | Actively Managed       | Fully               | N/A                     | Minimal/no impactful extractive or destructive activities occurring |
| Harris Point (San Miguel Island)     | State Marine Reserve   | 65.8                           | Actively Managed       | Fully               | N/A                     | Minimal/no impactful extractive or destructive activities occurring |
| Harris Point (San Miguel Island)     | Federal Marine Reserve | 61.2                           | Actively Managed       | Fully               | N/A                     | Minimal/no impactful extractive or destructive activities occurring |
| Footprint (Anacapa Channel)          | Federal Marine Reserve | 55.3                           | Actively Managed       | Fully               | N/A                     | Minimal/no impactful extractive or destructive activities occurring |
| Gull Island (Santa Cruz Island)      | State Marine Reserve   | 51.6                           | Actively Managed       | Fully               | N/A                     | Minimal/no impactful extractive or destructive activities occurring |
| Gull Island (Santa Cruz Island)      | Federal Marine Reserve | 37.5                           | Actively Managed       | Fully               | N/A                     | Minimal/no impactful extractive or destructive activities occurring |
| South Point (Santa Rosa Island)      | State Marine Reserve   | 33.9                           | Actively Managed       | Fully               | N/A                     | Minimal/no impactful extractive or destructive activities occurring |
| Carrington Point (Santa Rosa Island) | State Marine Reserve   | 33.1                           | Actively Managed       | Fully               | N/A                     | Minimal/no impactful extractive or destructive activities occurring |
| Santa Barbara Island                 | State Marine Reserve   | 33.1                           | Actively Managed       | Fully               | N/A                     | Minimal/no impactful extractive or destructive activities occurring |

# Supplementary Material

|                                  |                                  |      |                  |         |         |                                                                                            |
|----------------------------------|----------------------------------|------|------------------|---------|---------|--------------------------------------------------------------------------------------------|
| Anacapa Island                   | State Marine Reserve             | 29.9 | Actively Managed | Fully   | N/A     | Minimal/no impactful extractive or destructive activities occurring                        |
| Scorpion (Santa Cruz Island)     | State Marine Reserve             | 25   | Actively Managed | Fully   | N/A     | Minimal/no impactful extractive or destructive activities occurring                        |
| Scorpion (Santa Cruz Island)     | Federal Marine Reserve           | 22.8 | Actively Managed | Fully   | N/A     | Minimal/no impactful extractive or destructive activities occurring                        |
| Anacapa Island                   | State Marine Conservation Area   | 18.9 | Actively Managed | Lightly | fishing | Moderate number of moderate-impact fishing gear types in use (e.g., spearfishing by SCUBA) |
| Footprint (Anacapa Channel)      | State Marine Reserve             | 18.3 | Actively Managed | Fully   | N/A     | Minimal/no impactful extractive or destructive activities occurring                        |
| Judith Rock (San Miguel Island)  | State Marine Reserve             | 11.8 | Actively Managed | Fully   | N/A     | Minimal/no impactful extractive or destructive activities occurring                        |
| Anacapa Island                   | Federal Marine Reserve           | 9.8  | Actively Managed | Fully   | N/A     | Minimal/no impactful extractive or destructive activities occurring                        |
| Anacapa Island                   | Federal Marine Conservation Area | 6.1  | Actively Managed | Lightly | fishing | Moderate number of moderate-impact fishing gear types in use (e.g., spearfishing by SCUBA) |
| South Point (Santa Rosa Island)  | Federal Marine Reserve           | 4.9  | Actively Managed | Fully   | N/A     | Minimal/no impactful extractive or destructive activities occurring                        |
| Painted Cave (Santa Cruz Island) | State Marine Conservation Area   | 4.6  | Actively Managed | Lightly | fishing | Moderate number of moderate-impact fishing gear types in use (e.g., spearfishing by SCUBA) |
| Skunk Point (Santa Rosa Island)  | State Marine Reserve             | 3.8  | Actively Managed | Fully   | N/A     | Minimal/no impactful extractive or destructive activities occurring                        |

**Box S1. Case Study: Biscayne National Park**

Biscayne National Park (BNP) is the nation's largest marine National Park. Approximately 95% of its 700 km<sup>2</sup> are marine waters, which include fringing mangroves, seagrass beds, barrier islands, and coral reefs. The park is visited by more than half a million people annually, most of whom are recreational fishers and boaters. Fishing activities are managed under shared authority of the National Park Service (NPS) and the State of Florida. This is expressly stated in the park's enabling legislation (16 U.S.C. sec. 410gg-2). The original General Management Plan (GMP) dates from 1983.

There has been depletion in BNP of various species of snapper and grouper, the principal fishes targeted by recreational fishers (Ault et al., 2020). NPS initiated development of a new GMP in 2001 with scoping meetings and the formation of a Fishery Management Council. NPS released its Draft GMP and Draft Environmental Impact Statement in 2011, which proposed a single fully protected MPA. NPS subsequently revised its proposal to increase coral reef protection.

After 12 public hearings and over 43,000 public comments, 90% of which supported creation of the fully protected MPA, the NPS approved the proposal in 2015. However, the Secretary of the Interior never gave approval to the fully protected area, and implementation never occurred. Despite the successful implementation of fully protected areas in the adjacent Florida Keys National Marine Sanctuary, opposition from certain sportfishing groups, charter boat captains, and the State of Florida remained strong in BNP. The Florida Fish and Wildlife Conservation Commission (FWC) called fully protected MPAs a “measure of last resort” and did not approve the concept. The South Florida congressional delegation (both Republicans and Democrats) was also united in opposition to fully protected MPAs, putting forth a Senate bill (S. 3099 in the 114th Congress) to ban the fully protected MPA in BNP, and a House bill (H.R. 3310) went one step further to prohibit the NPS from creating fully protected MPAs in State waters included in any national park or national marine sanctuary without the approval of the appropriate State fish and wildlife management agency. Nevertheless, neither of these bills progressed out of committee in the 114th Congress.

In 2020, the FWC approved new fishing rules for BNP and agreed to reconsider the fully protected MPA in five years if FWC's increased size and bag limits fishery management tools failed to recover fish populations. In the meantime, destructive practices, including pollution from fishing vessels and fishing gear (derelict and otherwise) that damages corals are still permitted. These practices have the potential to degrade habitats in the BNP's coral reef tract, issues that size and bag limits do not fully address.

## References

- Ault, J. S., Abdo, M. E., and McLaughlin, C. (2020). Biscayne National Park Fishery Management Plan Reef Fishery Regulations and Science Plan Analysis. National Parks Conservation Association.
- Grorud-Colvert, K., Sullivan-Stack, J., Roberts, C., Constant, V., Horta e Costa, B., Pike, E., et al. (2021). The MPA Guide: A framework to achieve global goals for the ocean. *Science*. doi:10.1126/science.abf0861.
- Wilkinson, T. A. C., Wiken, E. B., Creel, J. B., Hourigan, T. F., Agardy, T., Herrmann, H., et al. (2009). *Marine ecoregions of North America*. Montréal, Québec: Commission for Environmental Cooperation.
